# Supplementary material
Source: PubMed Central journal article supplement (PMC8108067)
Supplement: NIHMS1689755-supplement-Supple_figures.pdf [file NIHMS1689755-supplement-Supple_figures.pdf]

## **SUPPLEMENTARY FIGURES**

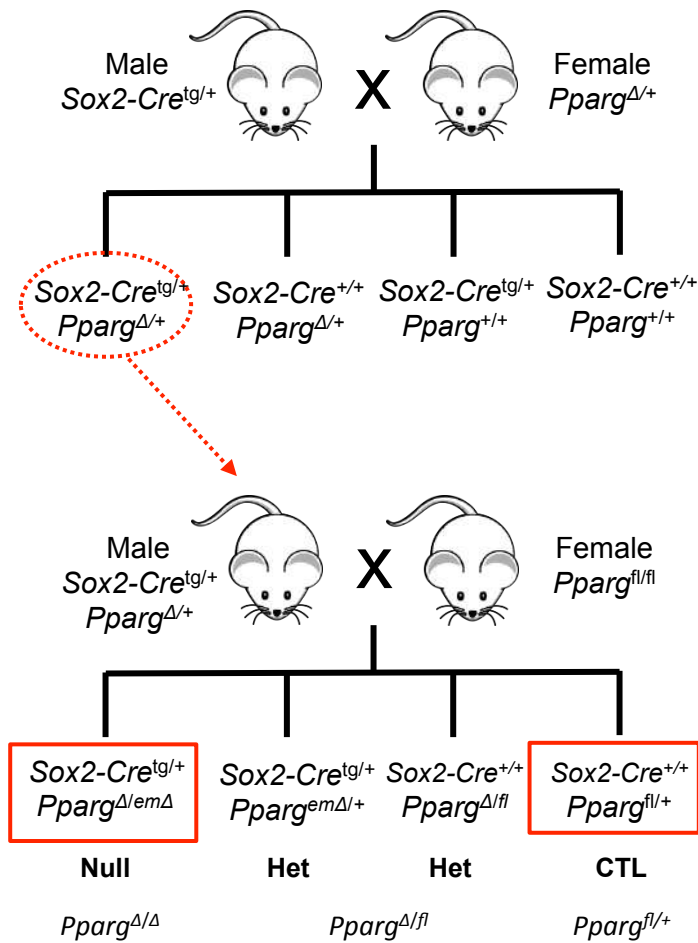

### Figure S1. Mating strategy and genotypes of $Pparg^{\Delta/\Delta}$ mice and their littermates

The  $Sox2-Cre$  transgene must be transmitted by a male mouse.  $Sox2-Cre^{tg/+}$ : carrier of one  $Sox2-Cre$  expressing allele.  $Sox2-Cre^{+/+}$ : no transmission of the  $Sox2-Cre$  transgene;  $Pparg^+$ : wild-type allele;  $Pparg^{fl}$ : functional  $Pparg$  allele carrying 2 flox sites flanking exon 1 and 2 of  $Pparg$ ;  $Pparg^{\Delta}$ :  $Pparg$  allele deleted of the genomic region encompassing exon 1 and exon 2, resulting in a non functional allele;  $Pparg^{em\Delta}$ :  $Pparg$  allele deleted during development in all the cells forming the embryo (epiblast deletion) but still present in the trophoblastic cells allowing a normal placental development. The last line gives the corresponding simplified names.

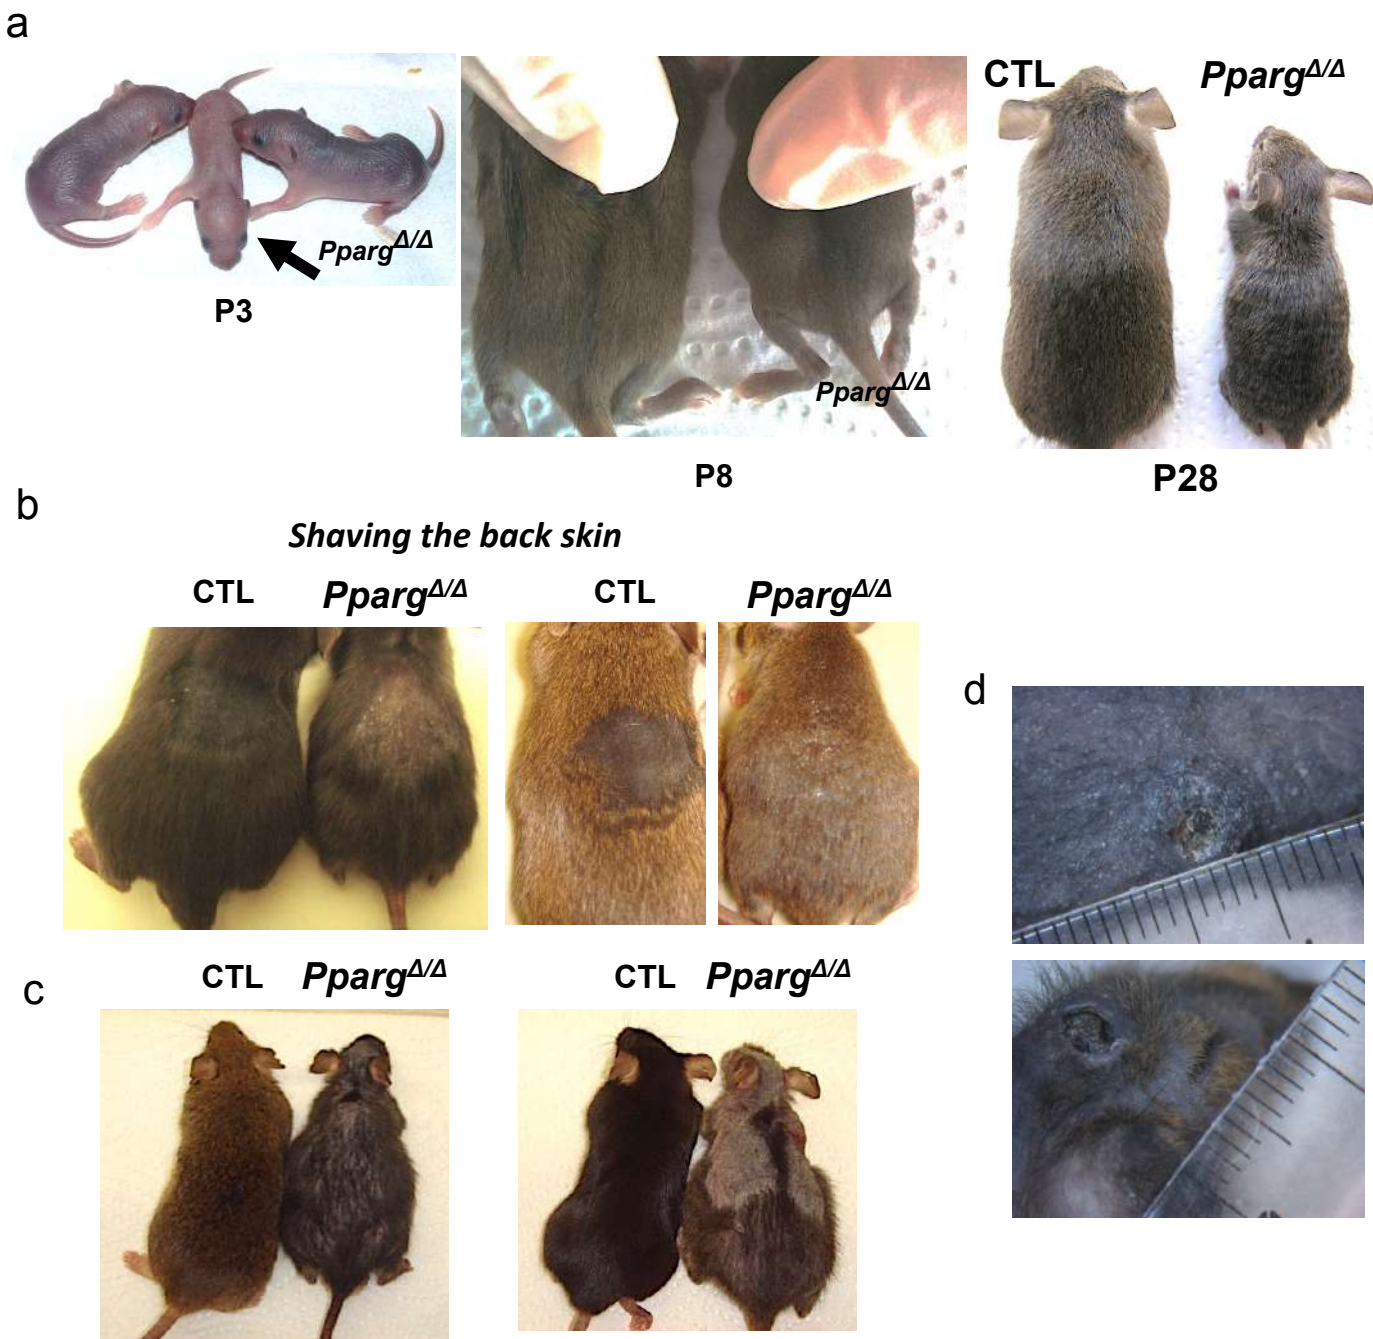

**Figure S2: Skin and hair phenotype in  $Pparg^{\Delta/\Delta}$  mice**

(a) Representative pictures of  $Sox2-Cre^{tg/+};Pparg^{\Delta/em\Delta}$  ( $Pparg^{\Delta/\Delta}$ ) and littermates taken at P3, P8 and P28. (b) Representative pictures of 4-5 weeks old  $Pparg^{\Delta/\Delta}$  and littermate control mice just shaved on the back. The shaved area is less recognizable in  $Pparg^{\Delta/\Delta}$ , due to their shorter hair, but shows flaking skin. (c) Representative pictures of patchy hair loss in 6 months old  $Pparg^{\Delta/\Delta}$  and control mice (CTL). (d) Representative pictures of skin lesions in  $Pparg^{\Delta/\Delta}$  mice.

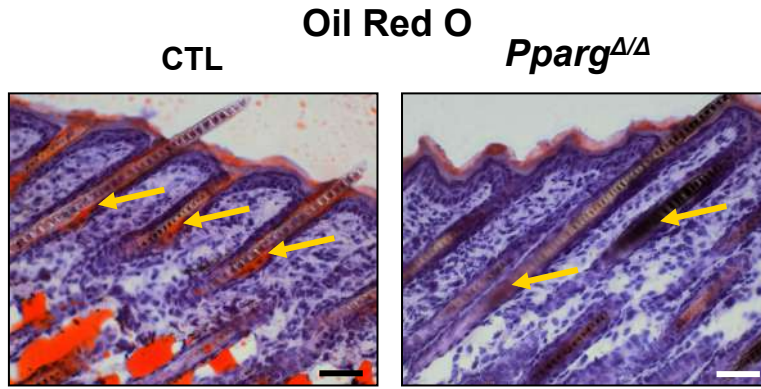

### Figure S3: Lack of sebaceous glands in *Pparg*<sup>Δ/Δ</sup> skin

Oil Red O staining of back skin cryosections from *Sox2-Cre*<sup>tg/+</sup>;*Pparg*<sup>Δ/emΔ</sup> (*Pparg*<sup>Δ/Δ</sup>) and control (CTL) mice at P28. Yellow arrows indicate the sebaceous glands in control mice and the place where sebaceous glands should be in *Pparg*<sup>Δ/Δ</sup> mice. Scale bar= 50μm.

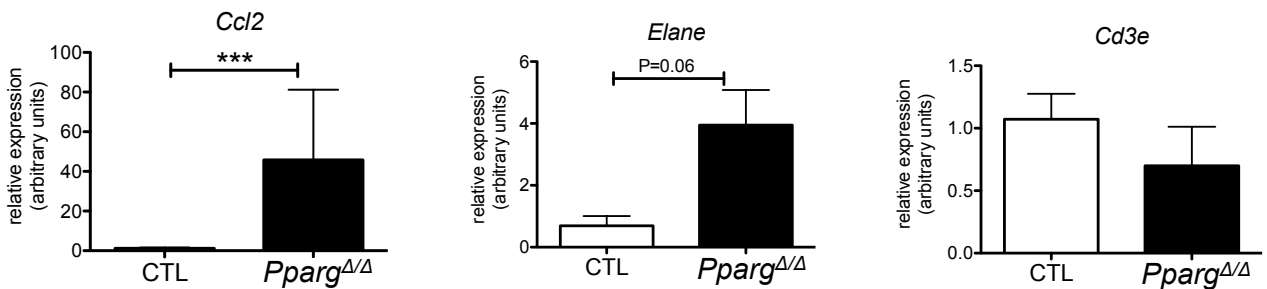

### Figure S4: Gene expression analysis of inflammatory markers in *Pparg*<sup>Δ/Δ</sup> skin at P28

Gene expression analysis of markers of immune cells, chemokine (C-C motif) ligand 2 (*Ccl2*) for macrophages, neutrophil elastase (*Elane*) for neutrophils, CD3 (*Cd3e*) for T lymphocytes. RNA was isolated from total skin of *Sox2-Cre*<sup>tg/+</sup>;*Pparg*<sup>Δ/emΔ</sup> (*Pparg*<sup>Δ/Δ</sup>) and control mice at P28 (n=4). Data are normalized to *Eef1a1* and expressed as mean ± SEM. \*\*\* represents p value <0.001.

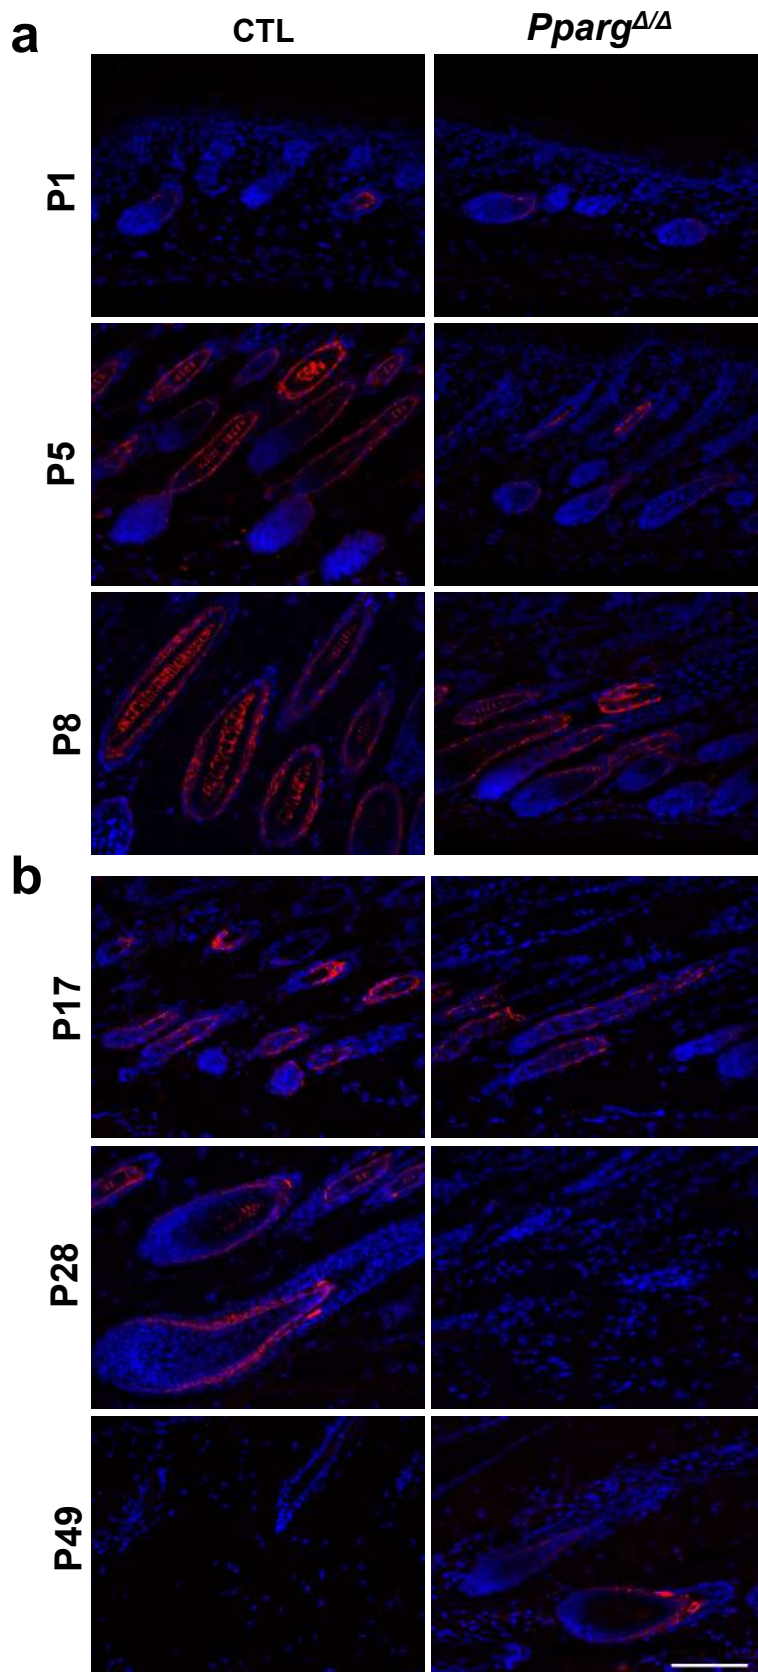

**Figure S5: Trichohyalin protein expression is desynchronized in *Pparg*<sup>Δ/Δ</sup> skin**  
 Representative images of IF staining of trichohyalin (red) in skin from *Sox2-Cre*<sup>tg/+</sup>; *Pparg*<sup>Δ/emΔ</sup> (*Pparg*<sup>Δ/Δ</sup>) and littermate controls (CTL) at different stages of HF morphogenesis (a) and of HF cycle (b) Nuclei are stained in blue. Scale bar=100μm.

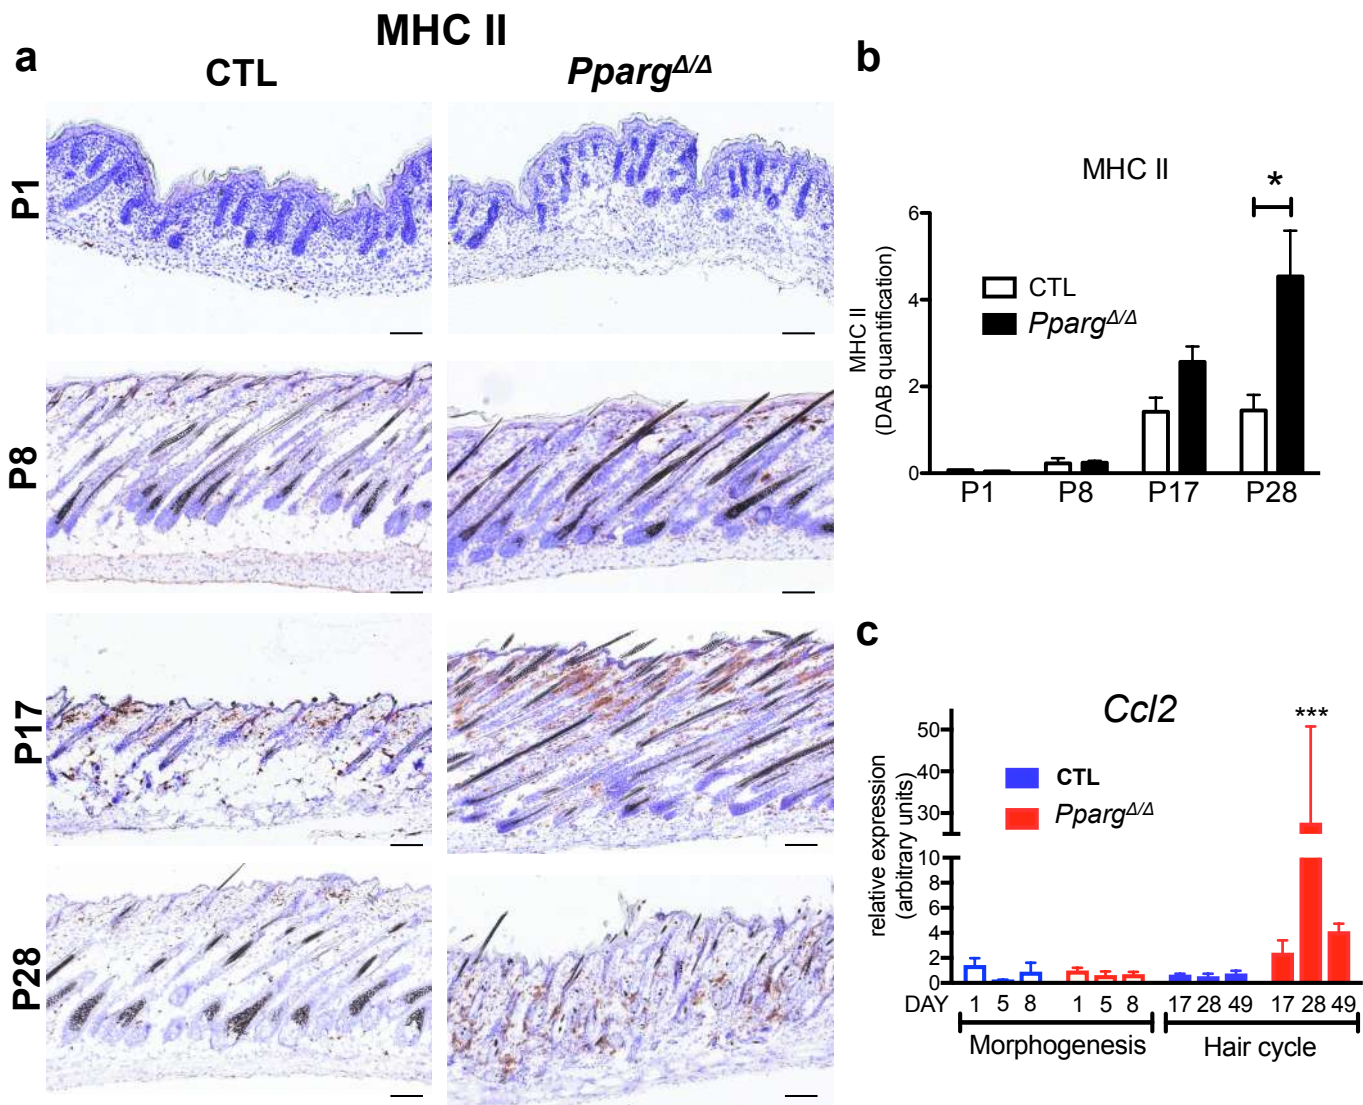

**Figure S6: Inflammatory infiltrate appears in *Pparg*<sup>Δ/Δ</sup> skin starting from P17 onwards**

(a) Staining with antibody against major histocompatibility complex class II (MHC II) of skin sections from *Sox2-Cre*<sup>tg/+</sup>;*Pparg*<sup>Δ/emΔ</sup> (*Pparg*<sup>Δ/Δ</sup>) and control (CTL) mice. Scale bar=100μm (b) DAB staining quantification, normalized to the skin area of each section. Data are expressed as mean ± SEM. \* represents p<0.05 (c) Gene expression analysis of skin from *Pparg*<sup>Δ/Δ</sup> (*y*<sup>Δ/Δ</sup>; red bars) and control (CTL; blue bars) mice at different stages of hair morphogenesis: P1 (n=5), P5 (n=6) and P8 (n=5); and hair cycle: P17, P28 and P49 (n=4). mRNA levels of Chemokine (C-C motif) ligand 2 (*Ccl2*), as macrophage marker, are shown. Data were normalized to *Eef1a1* and expressed as mean ± SEM. \*\*\* represents p<0.001.

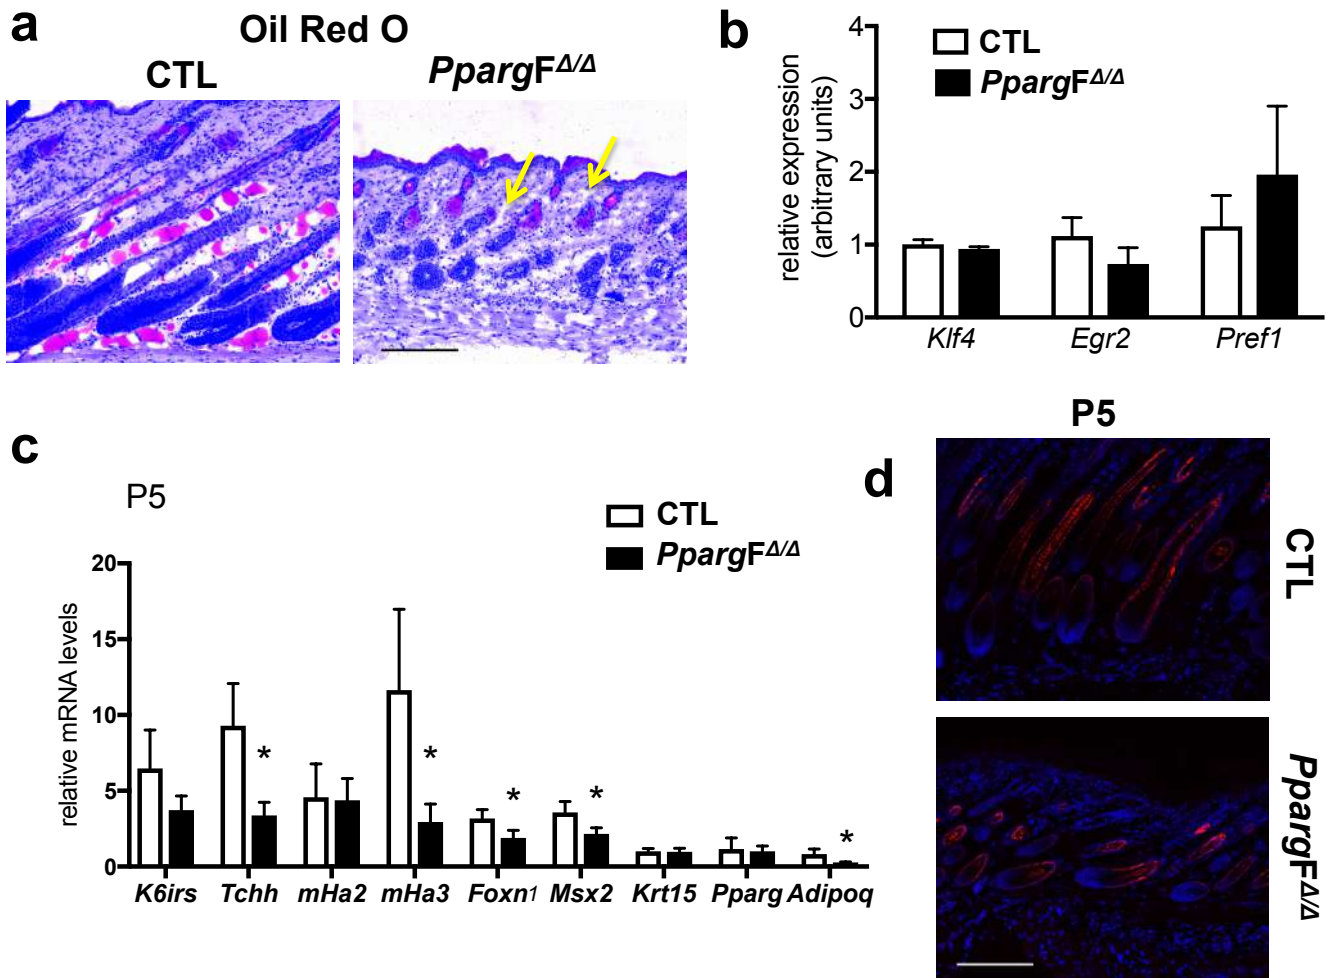

**Figure S7: HF morphogenesis phenotype of fat-specific *Pparg* knock-out mice**

(a) Oil Red O staining of back skin cryosections from *Adipoq-Cre<sup>tg/+</sup>;Pparg<sup>fl/fl</sup>* (*Pparg*<sup>F $\Delta/\Delta$</sup> ) and control (CTL) mice at P28. Yellow arrows indicate the sebaceous glands in *Pparg*<sup>F $\Delta/\Delta$</sup>  mice. (b) Gene expression analysis in full thickness skin of preadipocyte-markers, kruppel like factor 4 (*Klf4*), early growth response 2 (*Egr2*) and preadipocyte factor 1 (*Pref1*) in *Pparg*<sup>F $\Delta/\Delta$</sup>  and control (CTL) mice at P1 (n=4 for CTL, n=3 for *Pparg*<sup>F $\Delta/\Delta$</sup> ). Data are normalized to *Eef1 $\alpha$ 1* and expressed as mean  $\pm$  SEM. (c) Gene expression analysis in full thickness skin of keratin 72 (*K6irs*), trichohyalin (*Tchh*); murine type I hair keratins *mHa2* and *mHa3*; forkhead box N1 (*Foxn1*), homeobox msh-like 2 (*Msx2*), Keratin 15 (*Krt15*), *Pparg* (*Pparg*) and adiponectin (*Adipoq*) in *Pparg*<sup>F $\Delta/\Delta$</sup>  and control (CTL) mice at P5 (n=4 for CTL, n=3 for *Pparg*<sup>F $\Delta/\Delta$</sup> ). Data are normalized to *Eef1 $\alpha$ 1* and expressed as mean  $\pm$  SEM. \* represents p<0.05. (d) Representative images of IF staining of trichohyalin (red) in skin from *Pparg*<sup>F $\Delta/\Delta$</sup>  and control (CTL) mice at P5. Nuclei are stained in blue. Scale bar=200 $\mu$ m.

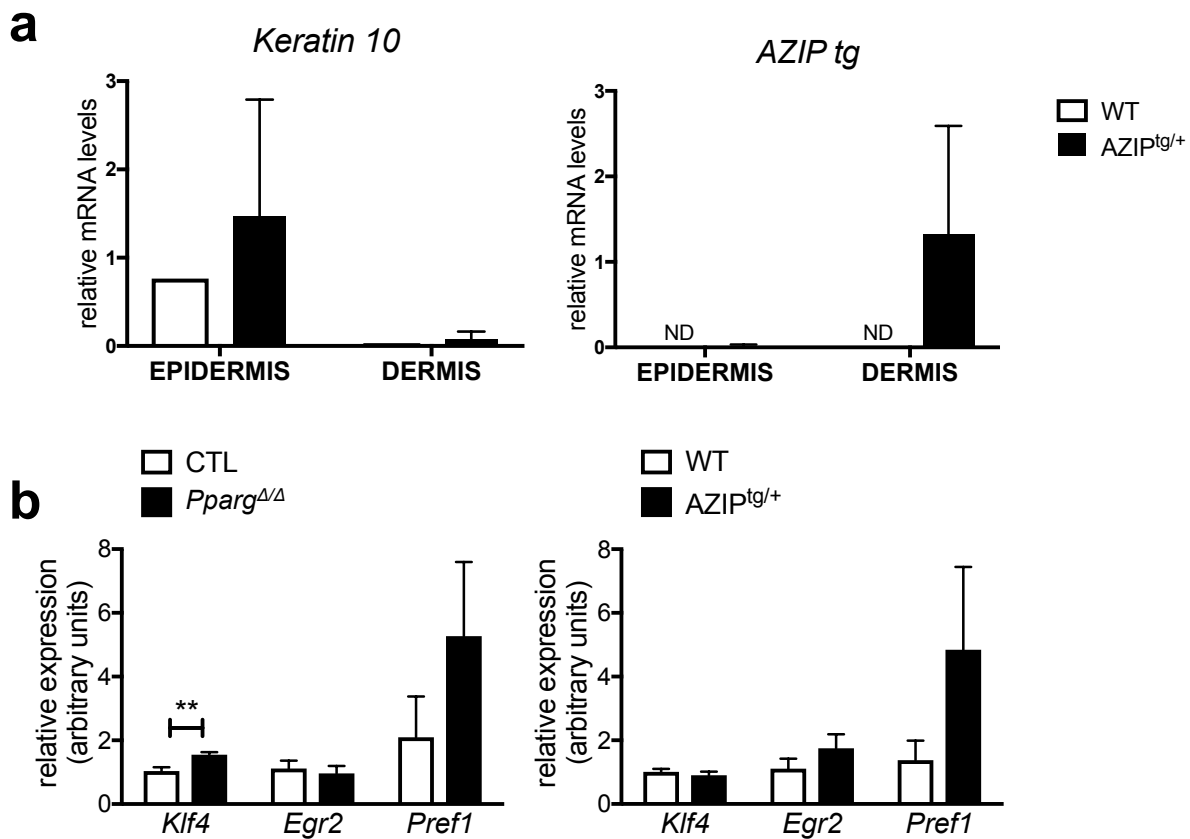

**Figure S8: Skin expression of the AZIP transgene and of preadipocyte markers in AZIP<sup>tg/+</sup> mice**

(a) Epidermis and dermis fractions were separated from the skin of AZIP<sup>tg/+</sup> and littermate wild type control mice. Gene expression analysis of Keratin 10, as a marker of epidermis, and of the AZIP transgene (AZIP tg) were evaluated. (b) Gene expression analysis of preadipocyte-markers, kruppel like factor 4 (*Klf4*), early growth response 2 (*Egr2*) and preadipocyte factor 1 (*Pref1*). RNA was isolated from total skin of *Pparg*<sup>Δ/Δ</sup> AZIP<sup>tg/+</sup> and the respective control mice at P1 (n=7 for CTL, n=5 for *Pparg*<sup>Δ/Δ</sup>, n=4 for AZIP<sup>tg/+</sup> and WT). Data are normalized to *Eef1a1* and expressed as mean ± SEM. \*\* represents p value <0.01.



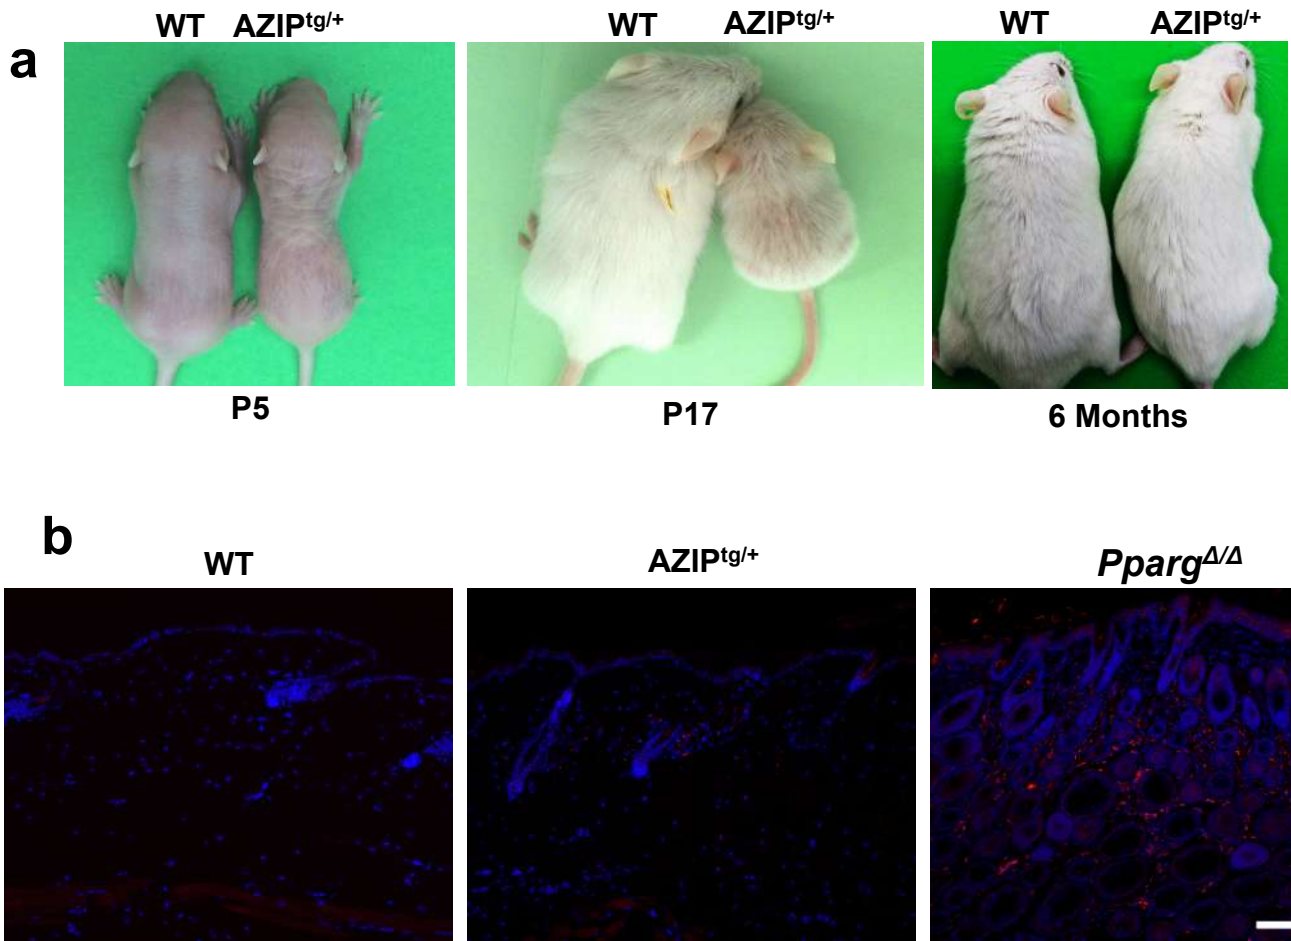

**Figure S9: AZIP<sup>tg/+</sup> mice show delayed hair growth, but no skin inflammation at adult stage**

**(a)** Representative pictures of AZIP<sup>tg/+</sup> and littermate controls taken at P5, P17 and 6 months. **(b)** IF staining of Iba1<sup>+</sup> macrophages (red) in the skin of 6 months old AZIP<sup>tg/+</sup> and littermate controls (nuclei are stained in blue). Skin from *Pparg*<sup>Δ/Δ</sup> (right panel) was used as positive control. Scale bar=200μm.

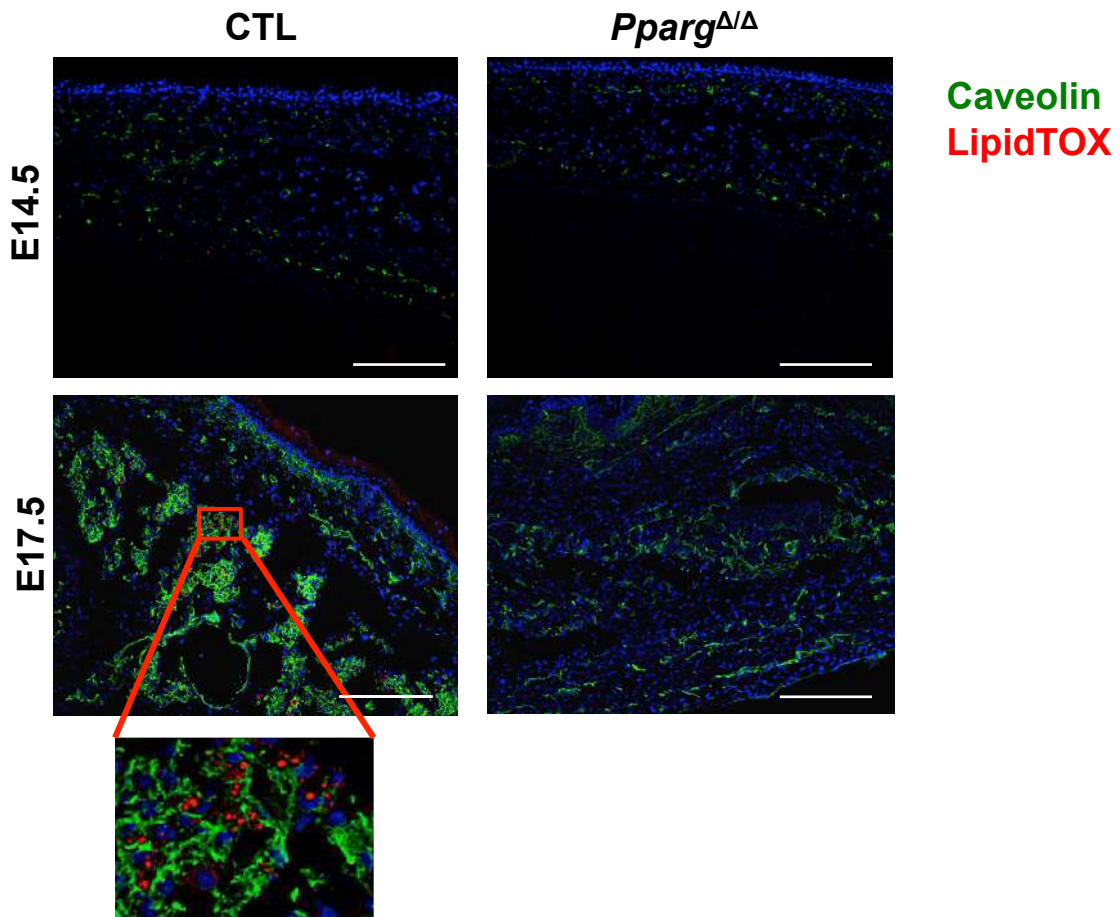

**Figure S10: Mature adipocytes appear at E17.5 during embryogenesis**

Frozen sections of embryos at E14.5 and E17.5 from *Sox2-Cre*<sup>tg/+</sup>;*Pparg*<sup>Δ/emΔ</sup> (*Pparg*<sup>Δ/Δ</sup>) and control (CTL) mice were stained in double immunofluorescence with rabbit anti-caveolin 1 (green) and HCS LipidTOX (red) to mark mature adipocytes, as described in Le Lay et al. 2010. Scale bar=200μm.

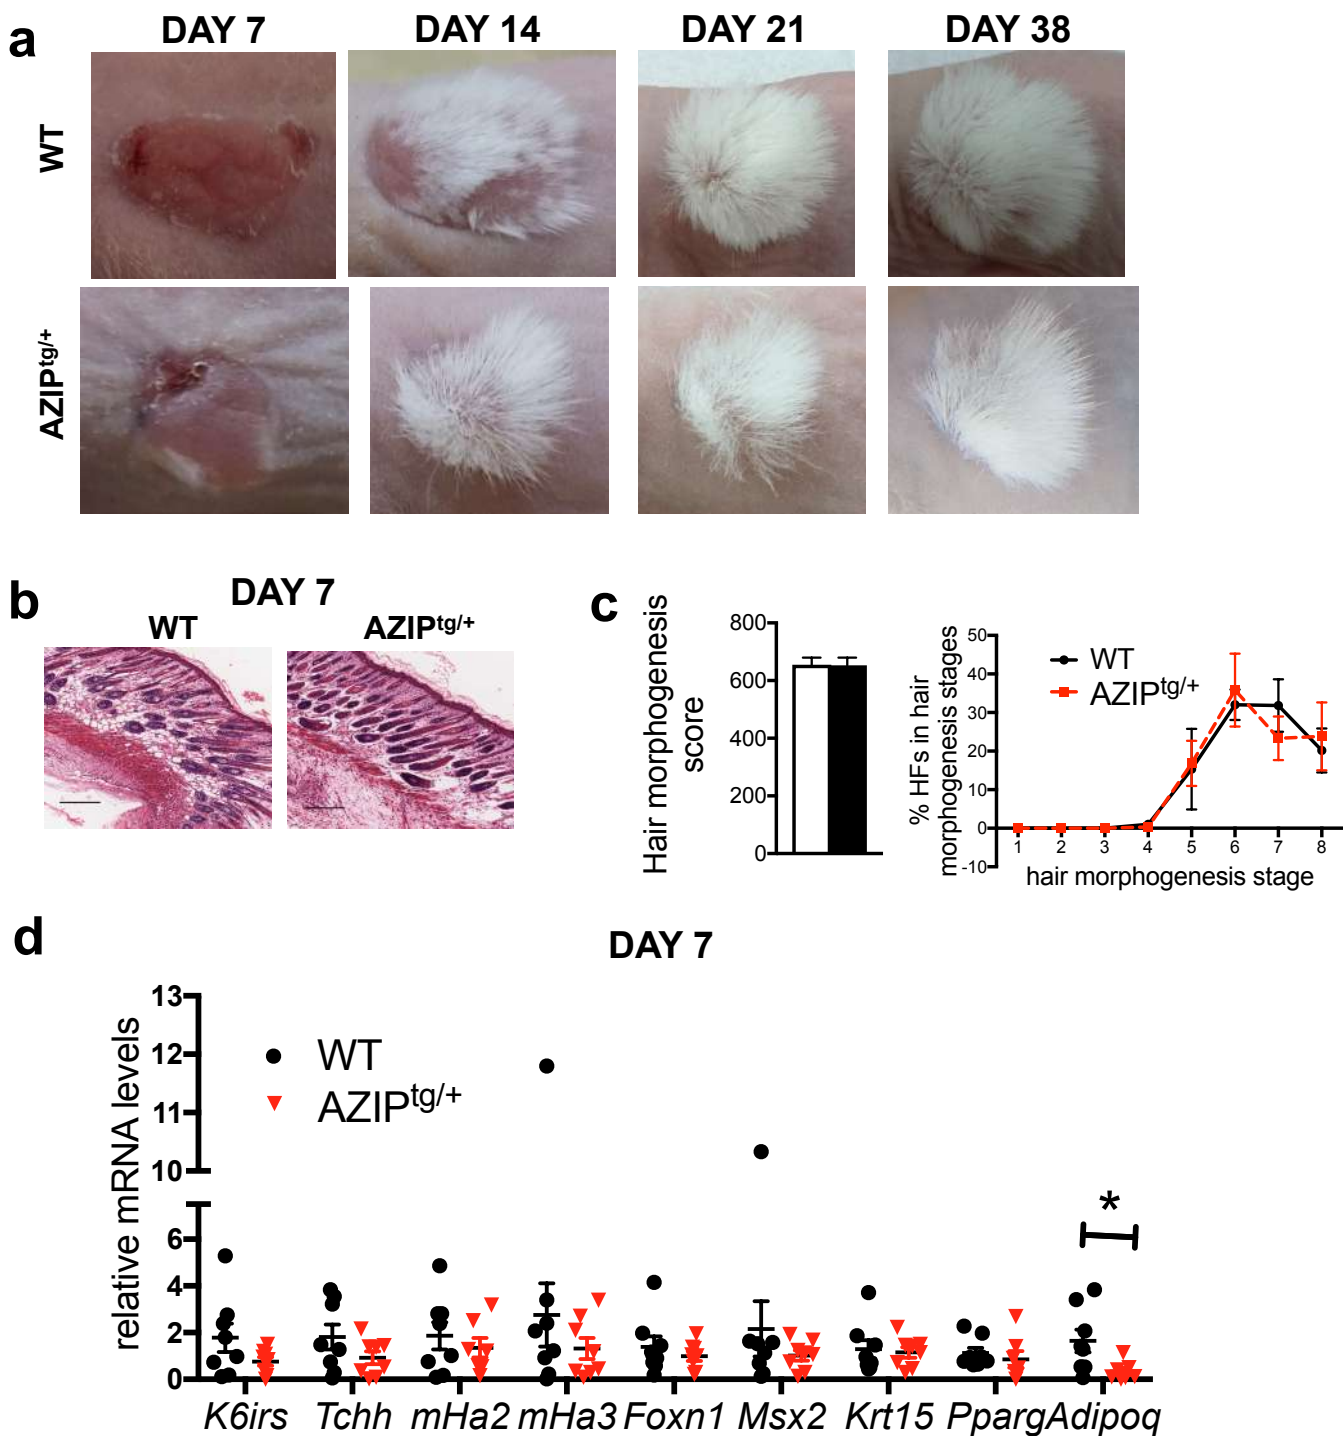

### Figure S11: Role of adipose tissue for hair follicle postnatal differentiation

(a) Representative images of skin grafts from AZIP<sup>tg/+</sup> and wild-type (WT) embryos on *Foxn1<sup>nu/nu</sup>* mice, 7, 14, 21 and 38 days after engraftment. Scale bar=200 $\mu$ m (b) Representative picture 7 days after engraftment and (c) Quantitative histomorphometry analysis of hair morphogenesis. Hair morphogenesis score (left panel); % of HFs found in the different hair morphogenesis stages (right panel; n=6). (d) Gene expression of keratin 72 (*K6irs*), trichohyalin (*Tchh*); murine type I hair keratins *mHa2* and *mHa3*; forkhead box N1 (*Foxn1*), homeobox msh-like 2 (*Msx2*); Keratin 15 (*Krt15*), *Pparg* and adiponectin (*Adipoq*). Data are normalized to *Eef1a1* and expressed as mean  $\pm$  SEM (n=8). \* represents p<0.05.

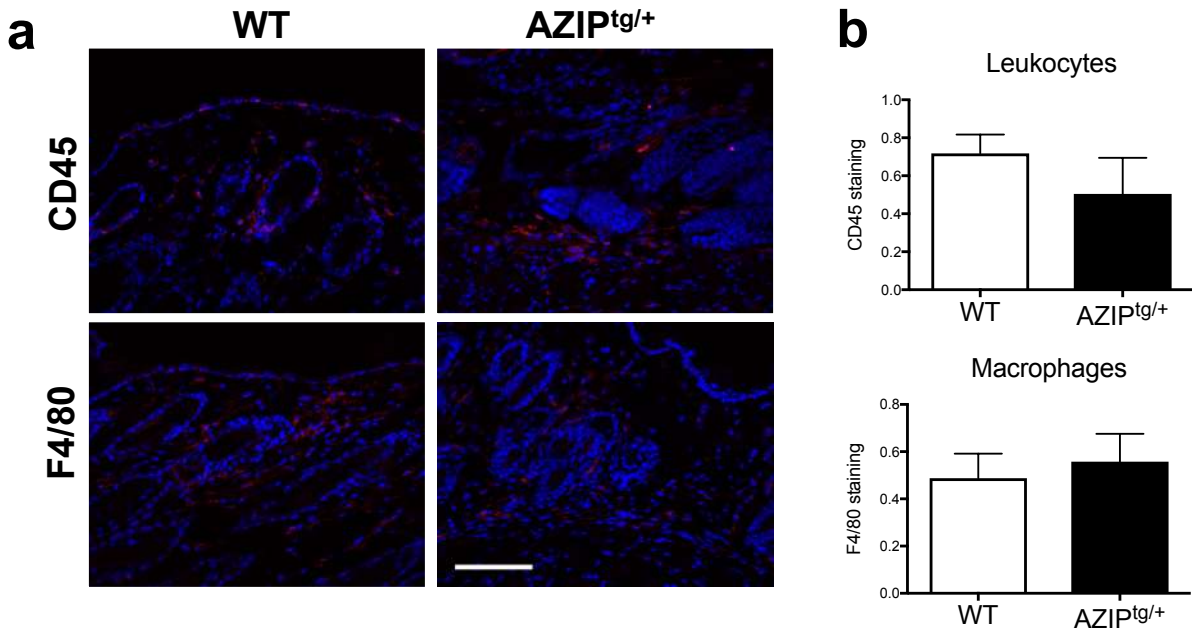

**Figure S12: No inflammation in AZIP<sup>tg/+</sup> grafts**

38 days after engraftment: **(a)** CD45 (leucocytes) and F4/80 (macrophages) immunostaining (red) and **(b)** their quantification. Scale bar=100 $\mu$ m.
